# Supplementary material for: Zn-facilitated surface reconstruction of Ni-MOF for an enhanced oxygen evolution reaction
Source: Royal Society of Chemistry journal article supplement (doi:10.1039/d4dt02040e), 2024-01-01
Supplement: d4dt02040e1.pdf [file d4dt02040e1.pdf]

## Supporting Information

### Zn-facilitated surface reconstruction of Ni-MOF for enhanced oxygen evolution reaction

Fang Wu,<sup>a,b\*</sup> Yuhong Jiao,<sup>a,b</sup> Jin-long Ge,<sup>a,b</sup> Yujun Zhu,<sup>c\*</sup> Chao Feng,<sup>a,b</sup> Zhong Wu,<sup>a,b</sup> Qiu Li<sup>a,b</sup>

<sup>a</sup>School of Materials and Chemical Engineering, Bengbu University, Bengbu, Anhui 233030, China. E-mail: bbcwuf@163.com

<sup>b</sup>Silicon Based New Materials Engineering Research Center of Anhui Province, Bengbu University, Bengbu, Anhui 233030, China. E-mail: bbcwuf@163.com

<sup>c</sup>Department of Pharmacy and Biomedical Engineering, Anhui Medical University, Hefei 230000, China. E-mail: zyj8119@sina.com

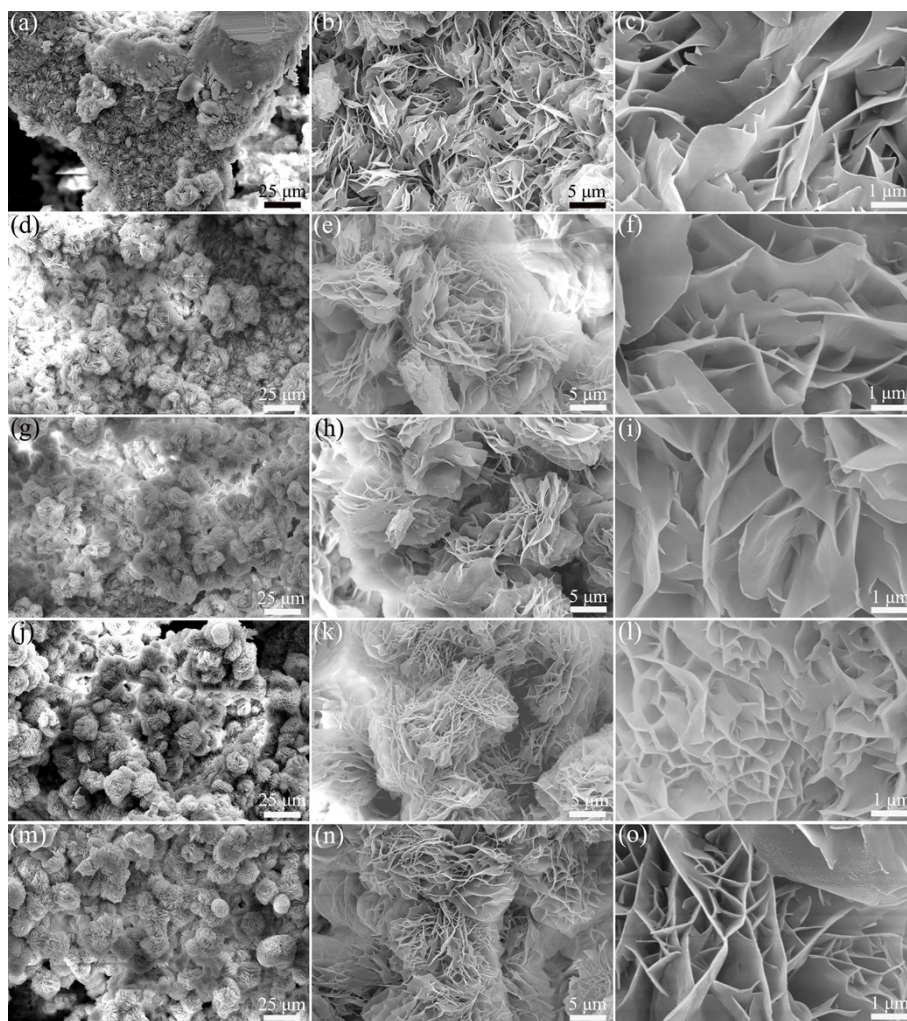

**Fig. S1** SEM images of (a-c)  $\text{Ni}_{10}\text{Zn-MOF/NF}$ , (d-f)  $\text{Ni}_3\text{Zn-MOF/NF}$ , (g-i)  $\text{Ni}_3\text{Zn}_2\text{-MOF/NF}$ , (j-l)  $\text{NiZn-MOF/NF}$ , (m-o)  $\text{Ni-MOF/NF}$ .

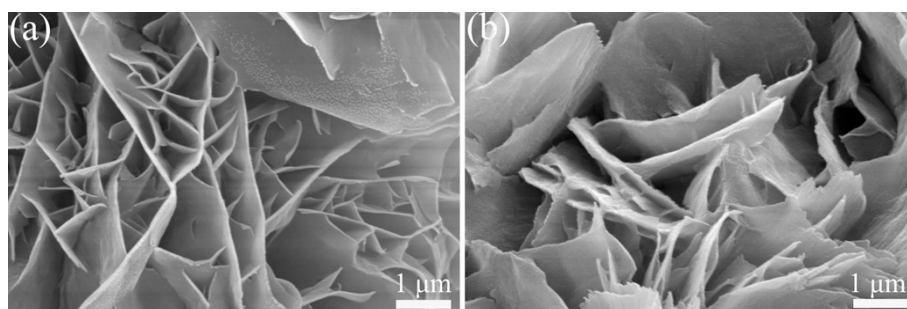

**Fig. S2** SEM images of (a)  $\text{Ni-MOF/NF}$ , (b)  $\text{Ni-MOF/NF-OH}$ .

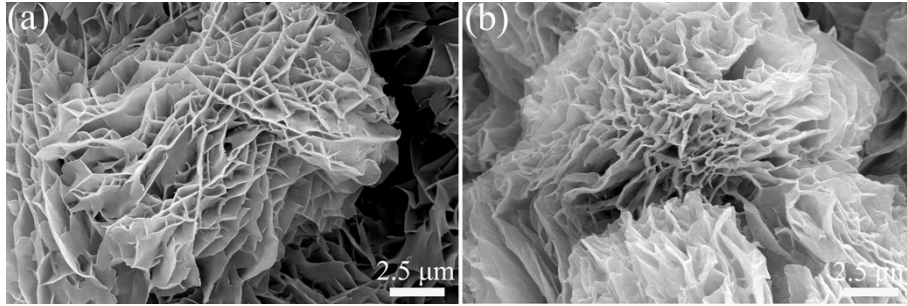

**Fig. S3** SEM images of (a) NiZn-MOF/NF, (b) NiZn-MOF/NF-OH.

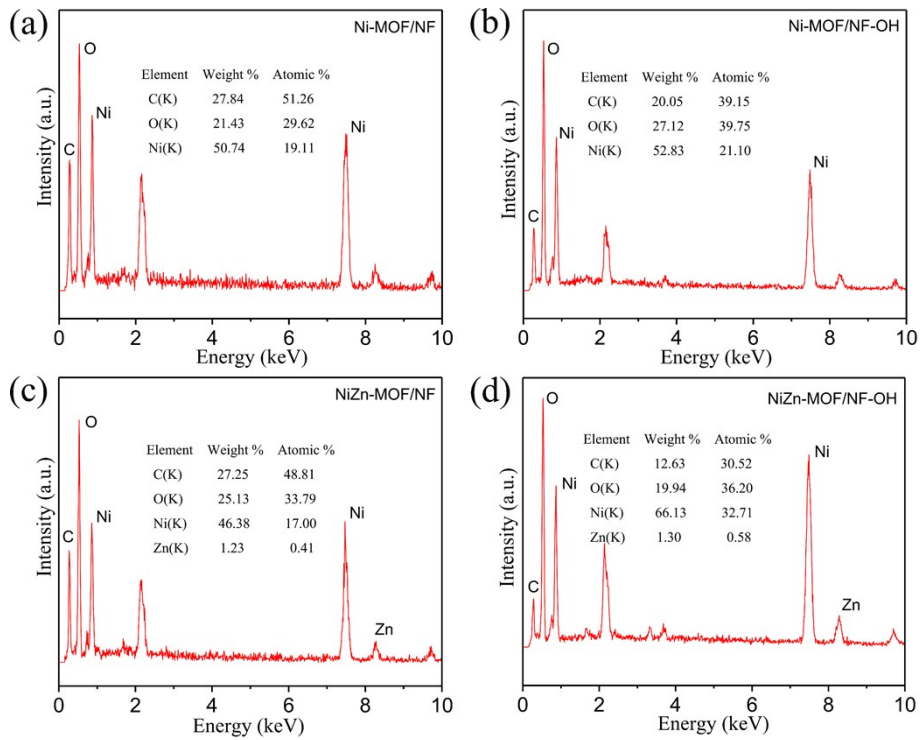

**Fig. S4** SEM-EDX spectra of (a) Ni-MOF/NF, (b) Ni-MOF/NF-OH, (c) NiZn-MOF/NF, (d) NiZn-MOF/NF-OH.

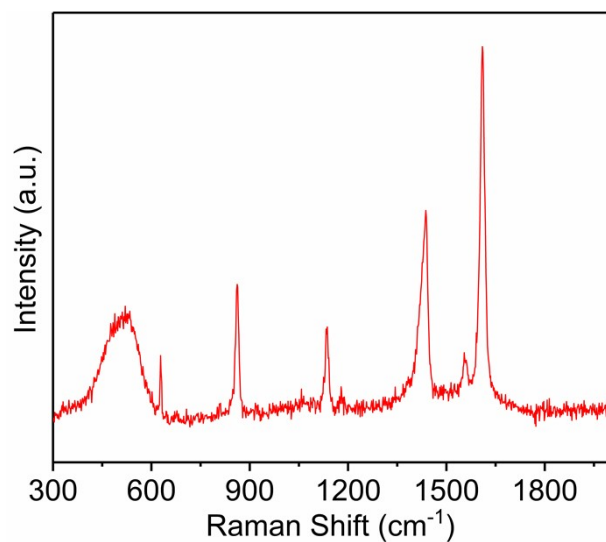

**Fig. S5** Raman spectrum of NiZn-MOF/NF-OH.

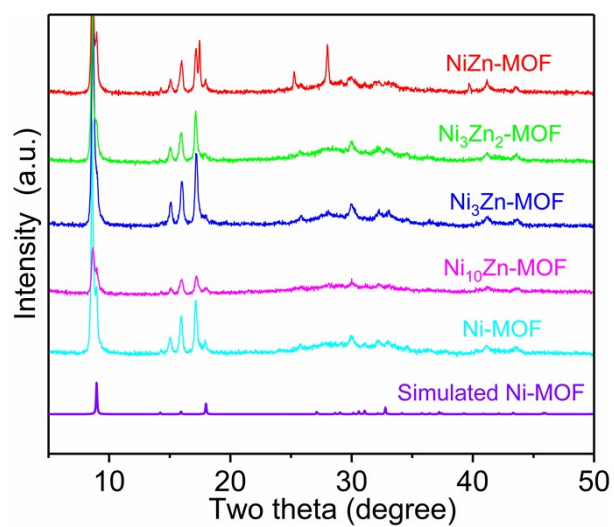

**Fig. S6** XRD patterns of NiZn-MOF, Ni<sub>3</sub>Zn<sub>2</sub>-MOF, Ni<sub>3</sub>Zn-MOF, Ni<sub>10</sub>Zn-MOF and Ni-MOF powder.

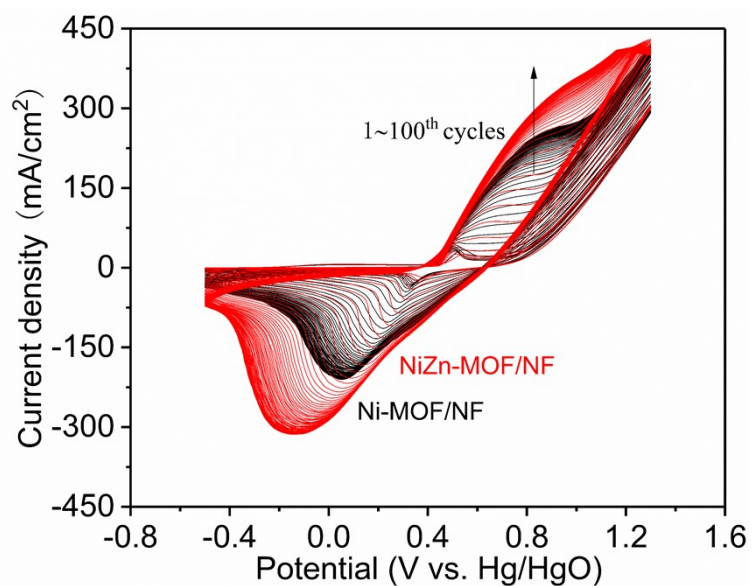

**Fig. S7** The evolution of CV curves for Ni-MOF/NF (black curve) and NiZn-MOF/NF (red curve).

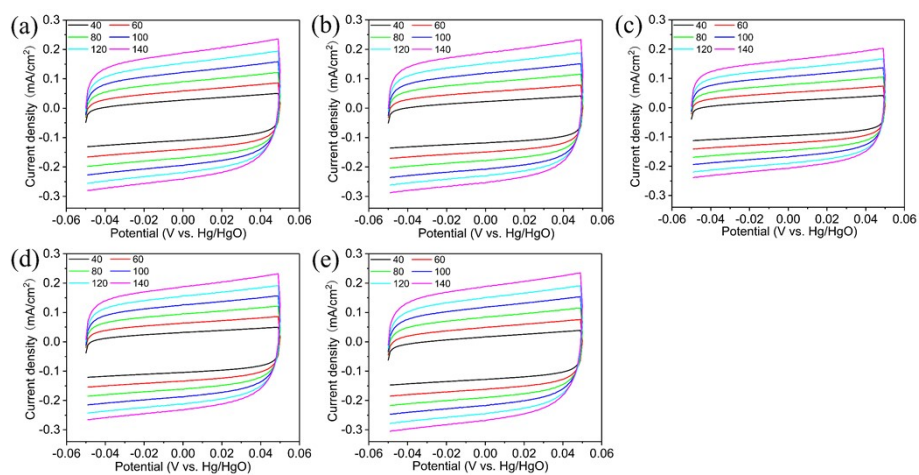

**Fig. S8** CV curves of (a) Ni-MOF/OH, (b) Ni<sub>10</sub>Zn-MOF/NF-OH, (c) Ni<sub>3</sub>Zn-MOF/NF-OH, (d) Ni<sub>3</sub>Zn<sub>2</sub>-MOF/NF-OH and (e) NiZn-MOF/NF-OH at different scan rates in the potential range of -0.05–0.05 V vs Hg/HgO.

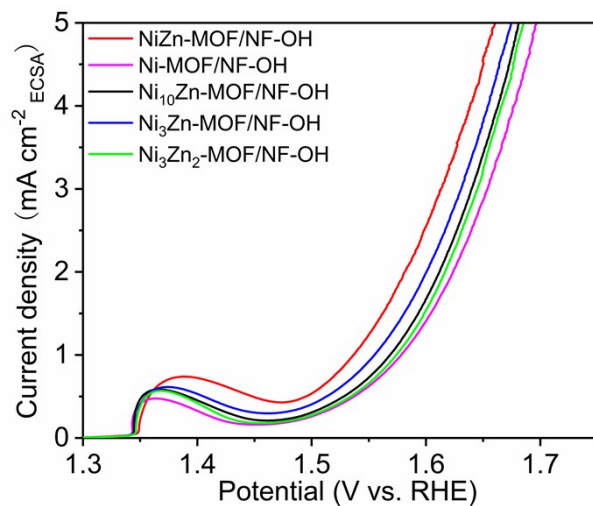

**Fig. S9** ECSA-normalized polarization curves for NiZn-MOF/NF-OH, Ni-MOF/NF-OH, Ni<sub>10</sub>Zn-MOF/NF-OH, Ni<sub>3</sub>Zn<sub>2</sub>-MOF/NF-OH, and Ni<sub>3</sub>Zn-MOF/NF-OH.

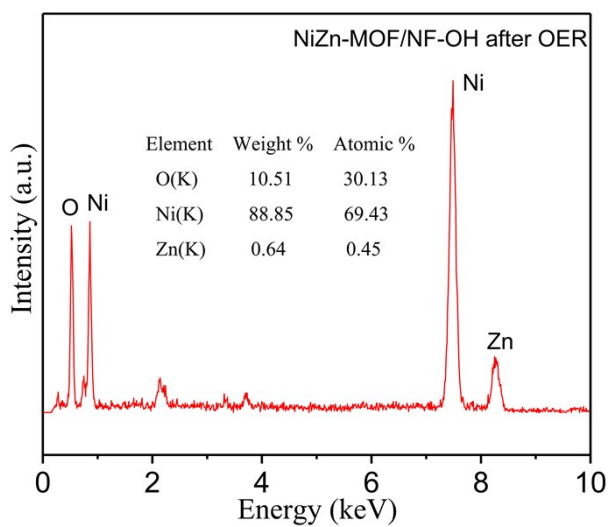

**Fig. S10** SEM-EDX spectrum of NiZn-MOF/NF-OH after stability test.

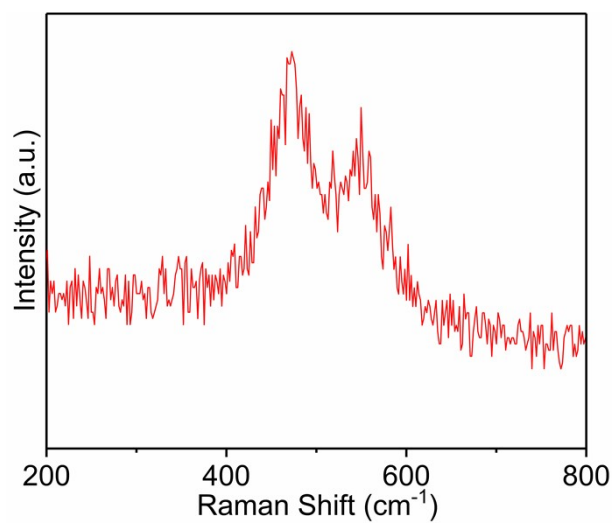

**Fig. S11** Raman spectrum of NiZn-MOF/NF-OH after stability test.
